# Supplementary material
Source: publisher site journal article supplement (https://www.dovepress.com/get_supplementary_file.php?f=+411006.xlsx)
Supplement: Supplementary file 1 [file get_supplementary_file.php]

## Sheet: Supplementary Table 1
Supplementary Table 1: Summary of the clinical characteristics and inducing factors of patients included in this study.
Specimen Serial Number	Gender(male=1,female=2)	Age	Strain code	Candida albicans (0=Yes,1=No)	single fungal and multi-fungal infections(single=1,multi=2)	Solid tumor(Yes=0,No=1)	Diabetes(No=0,Yes=1)	Pancreatitis(N=0,Yes=1)	Total parenteral nutrition(No=0,Yes=1)	Renal failure(No=0,Yes=1)	Recent surgery (within 2 weeks)(No=0,Yes=1)	Urinary catheter(No=0,Yes=1)	Gastric tube(No=0,Yes=1)	Central venous catheter(No=0,Yes=1)	Drainage catheter(No=0,Yes=1)	Immunosuppressants(No=0,Yes=1)	Stay in ICU(No=0,Yes=1)	Hypoproteinemia(No=0,Yes=1)	Invasive mechanical ventilation(No=0,Yes=1)	Endotoxic shock(No=0,Yes=1)	Multiple hospitalizations within 2 years(N=0,Yes=1)	Persistent fungal infection(No=0,Yes=1)Not measured=2	Length of stay(day)	Length of stay in ICU(day)	Tumor types	Specimen type	test method	Death (Deceased=1 Survived=0)	Serum albumin level(g/l)	Neutrophil count(10~9/L)	Lymphocyte count(10~9/L)	CD4/CD8	CD4	CD8	CD3	Serum creatinine level(1g/l)	Leukocyte count(10~9/L)	Total bilirubin level(umol/l)	CRP(mg/l)	PCT(ng/ml)	Bacteremia(0=Not detected 1=No 2=Yes)	Antibiotic use time（0=not used，1=within two weeks，2=over two weeks）	Use more than two antibiotics（0=not used，1<=two types，2>=two types）
61504238	1	76	cpa	0	1	1	0	0	1	0	0	0	0	0	0	0	0	0	0	0	1	0	73	0	Stomach cancer	blood	blood culture	0	35.2	4.12	0.79	NA	NA	0	0	58	5	30	NA	NA	2	0	0
61304906	1	60	cgl	0	1	1	0	0	0	0	0	0	0	0	0	0	0	1	0	0	1	2	8	0	Esophageal cancer	blood	blood culture	1	26.5	6.69	1.23	0.68	250	369	634	59	9.51	6.8	78.3	11.68	2	1	1
61408407	2	70	cpa	0	1	1	0	0	1	0	1	1	1	1	1	0	0	1	0	0	0	2	18	0	Colon cancer	blood	blood culture	0	22.7	6.57	0.33	NA	NA	NA	NA	47	7.13	7	NA	NA	1	1	1
61404296	1	66	cgu	0	1	1	0	0	1	0	1	1	1	0	1	0	0	1	0	0	0	1	23	0	Colon cancer	blood	blood culture	0	27.9	7.73	0.33	NA	NA	NA	NA	61	8.39	20.3	97.7	1.14	1	1	1
61400665	1	74	cgu	0	1	1	0	0	1	0	1	1	0	1	0	0	0	1	0	0	1	2	33	0	Rectal cancer	blood	blood culture	0	21.1	4.5	0.52	NA	NA	NA	NA	67	5.25	11.7	NA	NA	1	1	1
61701941	2	69	cpa	0	1	1	0	0	1	0	1	1	1	1	1	0	1	1	1	0	0	2	22	3	Rectal cancer	blood	blood culture	0	24.2	9.96	0.77	NA	NA	NA	NA	50	11.28	13.5	101	1.98	1	1	1
61505632	1	62	cpa	0	1	1	0	0	1	0	0	0	1	1	1	0	1	1	0	1	1	1	6	1	Small bowel cancer	blood	blood culture	1	27	9.69	2.54	0.55	549	999	1590	37	12.45	31.2	NA	NA	2	1	1
61702397	1	53	cpa	0	1	1	0	0	1	0	1	1	1	0	1	0	0	1	0	0	0	2	21	0	Rectal cancer	blood	blood culture	0	26.3	4.41	0.69	NA	NA	NA	NA	55	5.9	9.1	131	0.11	1	1	1
61300276	1	54	cpa	0	1	1	0	0	1	0	0	1	0	1	1	0	0	0	0	0	0	2	21	0	Cholangiocarcinoma	blood	blood culture	0	34.6	3.89	0.84	NA	NA	NA	NA	60	5.09	138.7	NA	NA	1	1	1
61308503	2	28	cgu	0	1	1	0	0	1	0	1	1	1	1	1	1	0	1	0	0	1	2	25	0	Stomach cancer	blood	blood culture	0	28.8	4.85	0.29	NA	NA	NA	NA	45	5.24	13.4	NA	NA	1	1	1
61702546	1	78	cpa	0	1	1	0	0	1	0	1	1	1	1	1	0	1	1	1	0	0	2	25	2	Rectal cancer	blood	blood culture	0	28.1	2.82	0.22	NA	NA	NA	NA	66	3.26	5.1	81.7	0.36	1	1	2
61605640	1	76	cgu	0	1	1	0	0	1	0	1	1	1	0	1	0	1	1	0	0	1	2	69	2	Rectal cancer	blood	blood culture	0	28.8	4.29	1.41	NA	NA	NA	NA	56	5.78	10.1	46.5	0.66	1	1	1
61705456	1	49	cpa	0	1	1	0	0	1	0	1	1	1	0	1	0	0	1	0	0	0	0	20	0	Stomach cancer	blood	blood culture	0	23.6	3.49	0.23	NA	NA	NA	NA	75	3.85	55.4	83.3	0.51	1	1	1
61308505	1	63	cgu	0	1	1	0	0	1	0	1	1	1	1	1	0	0	1	0	0	1	0	25	0	Stomach cancer	blood	blood culture	0	29	3.8	0.69	NA	NA	NA	NA	101	5.13	7.3	NA	NA	1	1	1
61700598	2	70	cgl	0	1	1	0	0	1	1	0	1	0	0	0	0	0	1	0	0	1	2	26	0	Cholangiocarcinoma	ascites	fungal culture	0	24.6	7.34	0.85	NA	NA	NA	NA	365	9.14	149.1	43.7	2.81	0	1	1
61610312	2	81	cgu	0	1	1	0	0	1	0	1	1	1	1	1	0	1	0	0	0	1	2	17	2	Colon cancer	blood	blood culture	0	31	8.06	1.19	NA	NA	NA	NA	46	10.2	11.4	NA	NA	1	1	1
61604903	2	81	cgu	0	1	1	1	0	1	0	0	1	0	1	0	0	0	1	0	0	1	2	12	0	Stomach cancer	blood	blood culture	0	20.7	1.14	0.44	NA	NA	NA	NA	39	1.9	5	NA	NA	2	1	1
61400781	1	60	cgu	0	1	1	0	0	1	0	1	1	1	0	1	0	0	0	0	0	1	2	17	0	Stomach cancer	blood	blood culture	0	34.3	8.42	0.76	NA	NA	NA	NA	78	10.21	17.8	NA	NA	1	1	1
61405644	2	59	cpa	0	1	1	0	0	1	0	1	1	1	0	1	0	0	1	0	0	0	0	20	0	Rectal cancer	blood	blood culture	0	27.1	8.83	0.58	NA	NA	NA	NA	43	9.79	6.4	2.49	NA	1	1	1
61701671	1	53	cgu	0	1	1	0	0	1	0	1	1	1	1	1	0	0	0	0	0	1	2	21	0	Stomach cancer	blood	blood culture	0	31.6	7.98	0.52	NA	NA	NA	NA	68	9.07	22.5	96.7	0.11	1	1	1
61604709	1	53	cgu	0	1	1	0	0	1	0	1	1	1	1	1	0	0	1	0	0	1	2	22	0	Stomach cancer	blood	blood culture	0	27	5.83	1.59	NA	NA	NA	NA	97	7.96	11.9	147	0.76	1	1	1
61701385	1	71	cpa	0	1	1	0	0	1	0	1	1	1	0	1	0	0	1	0	0	1	2	23	0	Stomach cancer	blood	blood culture	0	26.3	3.15	0.48	NA	NA	NA	NA	61	3.79	7.1	156	22.2	2	1	1
61400136	2	48	cgu	0	1	1	0	0	1	0	1	1	1	0	1	0	0	0	0	0	0	2	24	0	Rectal cancer	blood	blood culture	0	32.8	3.81	0.39	NA	NA	NA	NA	45	4.39	5.5	97.7	0.26	1	1	1
61401470	1	48	cpa	0	1	1	0	0	1	0	1	1	1	1	1	0	0	1	0	0	1	0	25	0	Colon cancer	blood	blood culture	0	22.7	4.93	0.56	NA	NA	NA	NA	53	5.68	19.1	138	0.24	1	1	1
61404183	2	64	cgu	0	1	1	0	0	1	0	1	1	1	0	1	0	0	0	0	0	1	2	28	0	Colon cancer	blood	blood culture	0	31.2	1.43	0.38	NA	NA	NA	NA	41	2.08	3.9	47.8	40.76	1	1	1
71707084	1	64	cgl	0	1	1	0	0	1	0	1	1	0	0	1	0	0	1	0	0	0	2	30	0	Stomach cancer	puncture	fungal culture	0	23.5	14.07	0.87	NA	NA	NA	NA	74	15.83	15.7	205.5	0.28	0	1	1
61605621	2	59	cgu	0	1	1	0	0	1	0	1	1	1	1	1	0	0	1	0	0	0	0	32	0	Sarcoma	blood	blood culture	0	27.3	3.25	0.44	NA	NA	NA	NA	40	4.3	7.4	101	3.29	1	1	1
61604007	1	64	cpa	0	1	1	0	0	1	0	1	1	1	0	1	0	0	1	0	0	0	0	33	0	Rectal cancer	blood	blood culture	0	29.5	4.89	0.16	NA	NA	NA	NA	66	5.26	7.1	135	0.22	1	1	1
61405771	1	63	cgu	0	1	1	0	0	1	0	0	1	0	1	1	0	0	1	0	0	0	2	49	0	Colon cancer	blood	blood culture	0	27.8	4.93	1	NA	NA	NA	NA	46	6.32	41	NA	NA	2	1	1
61605149	1	72	cgu	0	1	1	0	0	1	0	1	1	1	1	0	1	1	0	0	0	1	0	16	3	Rectal cancer	blood	blood culture	0	33.2	4.59	0.62	3.13	292	93	398	56	5.92	11.8	87.2	0.4	1	1	1
61607682	1	78	cgu	0	1	1	0	0	1	0	1	1	1	1	1	0	1	1	1	0	0	2	23	1	Stomach cancer	blood	blood culture	0	22.8	5.26	0.4	NA	NA	NA	NA	73	5.91	9.3	32.7	0.16	1	1	1
61303198	1	64	cpa	0	1	1	1	0	1	0	1	1	1	1	1	0	1	1	1	0	1	2	23	3	Stomach cancer	blood	blood culture	0	24	5.32	0.6	NA	NA	NA	NA	76	6.19	24.7	75.8	4.24	1	1	1
61606627	1	67	cgu	0	1	1	1	0	1	0	1	1	1	0	1	1	1	1	0	0	1	1	27	2	Stomach cancer	blood	blood culture	0	28.2	3.73	0.3	1.08	111	103	225	57	4.4	8.1	63.3	0.34	1	1	1
71602021	1	82	cpa	0	1	1	0	0	1	0	1	1	1	0	1	0	1	1	1	0	1	2	28	2	Colon cancer	catheter	fungal culture	0	26.4	5.07	0.24	NA	NA	NA	NA	66	5.62	5.4	33.5	NA	0	1	1
61602731	1	63	cpa	0	1	1	0	0	1	0	1	1	1	1	1	0	1	1	0	0	1	1	28	3	Stomach cancer	blood	blood culture	0	27.4	3.85	0.3	NA	NA	NA	NA	59	4.32	49.4	164	0.49	1	1	1
71304663	1	88	cal	1	1	1	1	0	1	0	1	1	0	1	0	0	1	1	0	0	1	2	31	5	Stomach cancer	drainage	fungal culture	1	21.5	14.51	1.39	NA	NA	NA	NA	61	17.04	125.9	182	11.95	2	1	1
61609234	1	72	cpa	0	1	1	0	0	1	0	1	1	1	1	1	1	1	0	1	0	1	1	38	12	Stomach cancer	blood	blood culture	0	30	3.07	1.04	NA	NA	NA	NA	146	5.29	11	117	0.54	2	1	1
61601574	1	65	cpa	0	1	1	0	0	1	0	1	1	1	1	1	0	0	0	0	0	1	2	19	0	Stomach cancer	blood	blood culture	0	30.5	7.16	0.61	NA	NA	NA	NA	69	8.45	14	96.1	0.1	1	1	1
61607286	1	56	cgu	0	1	1	0	0	1	0	1	1	1	0	1	0	0	1	0	0	1	0	20	0	Stomach cancer	blood	blood culture	0	25.8	1.94	0.23	NA	NA	NA	NA	68	2.35	8.2	20.8	0.1	1	1	1
61608202	1	51	cgu	0	1	1	0	0	1	0	1	1	0	0	1	1	0	1	0	0	1	1	21	0	Stomach cancer	blood	blood culture	0	22.7	4.12	0.91	NA	NA	NA	NA	35	5.76	12.7	101	0.34	1	1	1
61606731	1	66	cgu	0	1	1	0	0	1	0	1	1	1	0	1	0	0	1	0	0	1	2	21	0	Stomach cancer	blood	blood culture	0	28	7.54	1.47	NA	NA	NA	NA	52	9.35	14	163	NA	2	1	1
61403215	1	61	cpa	0	1	1	0	0	1	0	1	1	1	0	1	0	0	0	0	0	0	2	23	0	Stomach cancer	blood	blood culture	0	32.6	7.05	1.91	NA	NA	NA	NA	81	9.23	14.2	60.3	0.17	0	1	1
61607419	2	51	cgu	0	1	1	0	0	1	0	1	1	1	0	1	0	0	0	0	0	1	2	26	0	Rectal cancer	blood	blood culture	0	31.5	6.23	0.71	NA	NA	NA	NA	62	7.07	13.2	22.5	0.12	1	1	1
61700593	1	53	cgu	0	1	1	0	0	1	0	1	1	0	0	1	0	0	0	0	0	1	2	46	0	Stomach cancer	blood	blood culture	0	30.8	4.43	0.62	NA	NA	NA	NA	56	5.56	35.7	NA	NA	1	1	1
71702572	1	91	cal	1	2	1	1	0	0	1	0	1	0	1	0	0	1	0	1	0	1	1	23	8	Kidney Cancer	catheter	fungal culture	1	37.3	5.87	1.09	NA	NA	NA	NA	182	7.53	4.5	5.04	0.29	2	1	1
61401342	1	75	cpa	0	1	1	0	0	1	0	1	1	1	1	1	0	1	0	1	0	0	1	31	11	Colon cancer	catheter,blood	fungal culture	0	31	5.55	0.85	NA	NA	NA	NA	69	6.85	2.5	196	0.22	2	1	2
61508931	1	59	ctr	0	1	1	0	0	0	0	0	0	0	0	0	0	0	1	0	0	0	2	9	0	Liver cancer	ascites	blood culture	1	22.9	7.31	1.15	NA	NA	NA	NA	73	9.52	78.7	118	0.48	1	1	1
61402290	1	58	cgu	0	1	1	1	0	1	0	1	1	1	1	0	0	0	1	0	0	0	2	18	0	Stomach cancer	blood	blood culture	0	28.6	9.77	0.45	NA	NA	NA	NA	68	10.65	8.4	NA	NA	1	1	1
61307479	1	64	cpa	0	1	1	0	0	1	0	1	1	1	1	1	0	0	1	0	0	0	2	21	0	Stomach cancer	blood	blood culture	0	29	3.33	0.76	NA	NA	NA	NA	65	4.35	21.1	33.6	0.24	1	1	1
61507254	2	59	cpa	0	1	1	0	0	1	0	1	1	0	1	1	0	0	1	0	0	1	2	24	0	Rectal cancer	blood	blood culture	0	17.1	3.69	0.95	NA	NA	NA	NA	135	4.91	10	NA	NA	1	1	1
61507814	1	68	cpa	0	1	1	0	0	1	0	1	1	0	0	1	0	0	0	0	0	1	0	24	0	Stomach cancer	blood	blood culture	0	32.1	4.09	0.33	NA	NA	NA	NA	52	4.65	14.6	84.9	0.2	1	1	1
61508937	1	64	ctr	0	1	1	0	0	1	0	1	1	1	1	1	0	0	1	0	0	0	2	25	0	Stomach cancer	blood	blood culture	0	23.9	8.76	0.6	NA	NA	NA	NA	49	10.28	9.5	187	0.42	1	1	1
61607821	1	62	cgu	0	1	1	0	0	1	0	1	1	0	0	1	0	0	1	0	0	0	0	26	0	Colon cancer	blood	blood culture	0	28.8	2.75	0.74	NA	NA	NA	NA	59	3.79	17.1	67	0.48	1	1	1
61609154	2	63	cgu	0	1	1	0	0	1	0	1	1	0	1	1	0	0	1	0	0	0	0	32	0	Pancreatic cancer	catheter	fungal culture	0	29.1	4.8	0.54	NA	NA	NA	NA	42	5.85	26.7	62	0.14	1	1	1
61603052	2	57	cpa	0	1	1	0	0	1	0	1	1	1	1	1	0	0	1	0	0	0	1	34	0	Ampullary carcinoma	blood	blood culture	0	24.8	3.2	0.79	NA	NA	NA	NA	39	4.3	40.8	49.2	0.18	1	1	1
71604143	1	62	cgu	0	1	1	0	0	1	0	1	1	1	1	1	0	0	1	0	0	0	2	35	0	Stomach cancer	catheter	fungal culture	0	23.1	7.16	0.43	NA	NA	NA	NA	61	8.78	30.8	NA	NA	0	1	1
61305620	1	54	cgl	0	1	1	0	0	1	0	0	1	1	0	1	0	1	1	1	0	1	1	10	10	Liver cancer	blood	blood culture	1	23.4	23.07	2.54	NA	NA	NA	NA	241	27.64	103	101	17.45	2	1	1
71306671	1	75	cgl	0	1	1	0	0	1	0	1	1	1	1	1	0	1	1	1	0	1	2	17	9	Stomach cancer	drainage	fungal culture	0	16.2	22.5	0.41	NA	NA	NA	NA	219	24.07	45.7	305	>100.00	2	1	1
71306631	1	75	cgu	0	2	1	0	0	1	0	1	1	1	1	1	0	1	1	1	1	1	2	17	9	Stomach cancer	catheter	fungal culture	0	18.4	13.35	0.29	NA	NA	NA	NA	269	14.08	22.5	184	>100.00	2	1	1
61402346	2	74	cgu	0	1	1	1	0	1	0	1	1	1	1	1	0	1	0	1	1	1	1	22	8	Colon cancer	blood	blood culture	0	30.6	7.54	0.99	NA	NA	NA	NA	61	9.49	6	60.9	23.8	2	1	1
61602248	1	64	cpa	0	1	1	0	0	1	0	1	1	1	1	1	0	1	1	1	0	1	0	23	2	Stomach cancer	blood	blood culture	0	29.4	5.3	0.49	NA	NA	NA	NA	61	6.25	8.4	155	0.87	1	1	1
61506942	1	60	cgu	0	1	1	0	0	1	0	1	1	1	1	1	0	1	1	1	0	1	2	24	6	Stomach cancer	blood	blood culture	0	24.9	3.28	0.58	NA	NA	NA	NA	49	4.41	8.4	156	4.81	1	1	1
61407747	1	77	cal	1	1	1	0	0	1	0	1	1	1	1	1	0	1	0	1	0	1	0	35	3	Rectal cancer	blood	blood culture	0	35.5	9.22	0.55	NA	NA	NA	NA	58	10.04	15.6	NA	NA	1	1	2
71700665	1	59	cal	1	1	1	0	0	1	0	0	1	0	0	1	0	0	1	0	0	1	2	17	0	Stomach cancer	ascites	fungal culture	0	25.9	11.68	0.65	NA	NA	NA	NA	73	13.07	11.1	NA	NA	0	1	1
71605276	1	51	cgu	0	1	1	0	0	1	0	0	1	0	0	0	0	0	0	0	0	0	2	17	0	Small bowel cancer	catheter	fungal culture	0	32.6	5.74	0.3	NA	NA	NA	NA	41	6.32	3.7	NA	NA	0	1	1
61604371	2	53	cpa	0	1	1	1	0	1	0	1	1	0	0	1	0	0	0	0	0	1	2	18	0	Stomach cancer	blood	blood culture	0	31.5	5.79	0.73	NA	NA	NA	NA	45	7.09	12.7	117	0.14	1	1	1
61501938	2	54	cpa	0	1	1	0	0	1	0	1	1	0	0	1	0	0	1	0	0	1	2	24	0	Small bowel cancer	catheter,blood	fungal culture	0	29.5	11.42	0.43	NA	NA	NA	NA	33	12.29	6.8	2.93	NA	1	1	1
61608470	1	55	cgu	0	1	1	0	0	1	0	1	1	0	1	1	0	0	1	0	0	1	0	25	0	Rectal cancer	blood	blood culture	0	25.4	1.94	0.08	NA	NA	NA	NA	78	2.1	8.7	58	0.52	1	1	2
61608713	2	67	cpa	0	1	1	0	0	1	0	1	1	0	0	1	0	0	0	0	0	0	0	26	0	Colon cancer	blood	blood culture	0	31.7	7.12	0.49	NA	NA	NA	NA	35	7.95	8.6	NA	NA	1	1	1
71604326	1	61	cal	1	1	1	0	0	1	0	1	1	0	0	1	0	0	0	0	0	0	2	28	0	Stomach cancer	drainage	fungal culture	0	31.8	5.13	0.95	NA	NA	NA	NA	73	6.99	15.8	NA	NA	0	1	1
61404230	2	71	cpa	0	1	1	0	0	1	0	0	0	0	0	0	0	0	1	0	0	1	1	29	0	Colon cancer	blood	blood culture	1	29.4	4.83	0.63	NA	NA	NA	NA	42	5.8	2.9	17.5	0.18	1	1	1
61606669	1	81	cgu	0	1	1	0	0	1	0	0	1	0	1	1	0	0	0	0	0	0	1	29	0	Colon cancer	catheter	fungal culture	0	34	3.81	0.9	NA	NA	NA	NA	64	5.34	9.5	6.11	NA	1	1	1
61308437	1	45	cgu	0	1	1	0	0	1	0	1	1	0	0	1	0	0	1	0	0	0	0	36	0	Stomach cancer	blood	blood culture	0	22	7.39	0.5	NA	NA	NA	NA	65	8.21	28.5	NA	NA	1	1	1
61607152	1	52	cgu	0	1	1	0	0	1	0	1	1	1	1	1	0	0	1	0	0	0	2	51	0	Small bowel cancer	blood	blood culture	0	26.8	6.88	0.72	NA	NA	NA	NA	67	7.67	8.4	NA	NA	1	1	1
61308263	2	73	cgu	0	1	1	0	0	1	0	1	1	1	1	1	0	1	0	1	0	1	0	18	2	Rectal cancer	blood	blood culture	0	33.8	2.3	0.19	NA	NA	NA	NA	53	2.7	6.8	49.7	0.18	1	1	1
61609777	1	84	cgu	0	1	1	0	0	1	0	1	1	1	1	1	0	1	1	1	0	1	2	23	4	Colon cancer	blood	blood culture	0	26.4	3.36	0.54	NA	NA	NA	NA	66	4.4	13.8	38.1	0.22	1	1	2
71302857	1	74	cal	1	1	1	0	0	1	0	1	1	0	1	0	0	1	1	1	0	1	2	24	14	Stomach cancer	catheter	fungal culture	0	24.5	15.43	0.52	3.23	528	163	678	180	16.32	11.2	171	0.94	2	1	1
61307200	1	82	cgu	0	1	1	0	0	1	0	1	1	1	1	1	0	1	0	1	0	1	1	24	16	Colon cancer	blood	blood culture	1	34.2	5.68	0.7	NA	NA	NA	NA	94	6.68	12.1	33.4	0.31	2	1	2
61307545	1	84	cpa	0	1	1	0	0	1	0	0	1	1	1	1	0	1	1	1	1	1	2	39	15	Colon cancer	blood	blood culture	1	27.5	5.45	0.6	NA	NA	NA	NA	67	6.32	15.4	78	1.4	2	1	1
61407048	2	39	cgl	0	1	1	0	0	1	0	1	1	1	0	1	0	0	1	0	0	0	2	17	0	Ovarian cancer	blood	blood culture	0	24.3	10.76	0.49	NA	NA	NA	NA	39	11.48	6.7	71.9	0.46	1	1	1
71604797	1	69	cal	1	1	1	0	0	1	0	1	1	1	1	1	0	0	1	0	0	0	2	20	0	Cholangiocarcinoma	drainage	fungal culture	0	25.5	11.53	0.85	NA	NA	NA	NA	NA	13.55	25.6	NA	NA	0	1	1
71506557	1	61	cgl	0	1	1	0	0	1	0	0	1	0	1	0	0	0	1	0	0	1	2	25	0	Small bowel cancer	catheter	fungal culture	0	28.6	1.24	0.66	NA	NA	NA	NA	56	2.13	11	64.3	0.32	0	1	2
71307430	2	76	cpa	0	1	1	1	0	1	0	1	1	0	0	1	0	0	1	0	0	0	2	26	0	Rectal cancer	catheter	fungal culture	0	26.8	1.93	0.61	NA	NA	NA	NA	47	2.81	8.9	NA	NA	2	1	1
61601657	2	61	cpa	0	1	1	0	0	1	0	1	1	1	1	1	0	0	1	0	0	0	0	26	0	Rectal cancer	blood	blood culture	0	28.5	4.29	0.52	NA	NA	NA	NA	42	4.93	6.2	85	0.36	1	1	1
71404344	2	49	cpa	0	1	1	0	0	1	0	1	1	1	1	1	0	0	1	0	0	0	0	28	0	Pancreatic cancer	catheter	fungal culture	0	22.9	4.44	0.63	NA	NA	NA	NA	53	5.28	7.4	NA	NA	0	1	11
61600942	1	46	cpa	0	1	1	0	0	1	0	0	1	1	1	1	0	0	1	0	0	0	0	32	0	Sarcoma	catheter,blood	fungal culture	0	22.5	4.43	0.7	NA	NA	NA	NA	66	5.86	13	NA	NA	2	1	1
61704237	2	70	cpa	0	1	1	0	0	1	0	1	1	1	0	1	0	0	1	0	0	0	1	37	0	Stomach cancer	blood	fungal culture	0	29.3	3.89	0.62	NA	NA	NA	NA	71	4.88	8.5	66.2	0.13	2	1	1
61604674	2	53	cgu	0	1	1	0	0	1	0	1	1	1	1	1	1	0	0	0	0	1	2	39	0	Colon cancer	blood	blood culture	0	36.1	1.64	0.76	NA	NA	NA	NA	43	2.44	24	56	0.26	1	1	1
61701248	2	66	cpa	0	1	1	0	0	1	0	1	1	1	1	1	0	1	1	1	0	0	1	21	11	Stomach cancer	blood	blood culture	0	28.2	7.95	1.44	NA	NA	NA	NA	45	10.46	15.4	42.5	0.09	2	1	1
61607661	2	72	cgu	0	1	1	0	0	1	0	1	1	1	0	1	0	1	0	1	0	1	0	23	5	Colon cancer	blood	blood culture	0	33.2	2.39	1.13	NA	NA	NA	NA	38	3.96	3.1	57.5	0.42	1	1	2
61405118	2	82	cpa	0	1	1	0	0	1	0	1	1	1	1	1	0	1	0	1	0	0	0	25	5	Colon cancer	blood	blood culture	0	36.8	7.35	0.33	NA	NA	NA	NA	76	8.01	5.9	88.4	12.31	1	1	1
61401527	2	65	cpa	0	2	1	0	0	1	0	1	1	0	1	1	0	1	1	0	0	0	1	32	3	Rectal cancer	catheter,blood	fungal culture	0	27.6	4.85	0.73	NA	NA	NA	NA	142	5.97	4.6	NA	NA	1	1	1
71503034	1	57	cal	1	1	1	1	0	1	0	1	1	0	0	0	1	1	1	1	0	1	1	39	5	Liver cancer	drainage	fungal culture	0	24.8	3.15	0.51	2.98	180	61	250	87	4	18.8	106	0.41	2	1	2
61308185	2	61	cpa	0	1	1	0	0	1	0	1	1	1	1	1	0	0	1	0	0	1	1	16	0	Small bowel cancer	catheter,blood	fungal culture	0	26.4	10.21	0.76	NA	NA	NA	NA	65	11.69	16.1	NA	NA	1	1	1
61308196	1	57	cgu	0	1	1	0	0	1	0	1	1	1	1	1	0	0	1	0	0	0	2	16	0	Colon cancer	blood	blood culture	0	29.4	2.45	1.41	NA	NA	NA	NA	69	4.12	18.9	NA	NA	1	1	1
61401537	1	63	cpa	0	1	1	0	0	1	0	1	0	1	1	1	0	0	0	0	0	0	2	22	0	Rectal cancer	blood	blood culture	0	31.4	3.96	0.55	NA	NA	NA	NA	101	5.08	17.1	NA	NA	1	1	1
61403587	1	57	cpa	0	1	1	0	0	1	0	1	1	1	0	1	1	0	1	0	0	1	0	25	0	Rectal cancer	blood	blood culture	0	26	3.74	0.22	NA	NA	NA	NA	80	4.25	5.6	75.2	0.28	1	1	1
61702354	2	54	cgu	0	1	1	0	0	1	0	1	1	1	0	1	1	0	1	0	0	1	0	27	0	Stomach cancer	blood	blood culture	0	25.1	2.99	0.39	NA	NA	NA	NA	43	3.92	17.5	69.2	0.22	1	1	1
61405003	1	39	cgu	0	1	1	0	1	1	0	0	0	0	0	0	0	0	1	0	0	0	0	30	0	Pancreatic cancer	blood	blood culture	0	20.8	2.27	0.69	NA	NA	NA	NA	78	3.16	6.8	NA	NA	1	1	1
61502220	1	66	cgl	0	1	1	0	0	1	0	1	0	0	0	1	0	0	0	0	0	1	0	41	0	Cholangiocarcinoma	blood	blood culture	0	31	8.15	1.23	NA	NA	NA	NA	44	10.19	11.9	NA	NA	2	1	1
61408505	1	27	cgl	0	2	1	0	0	1	0	0	0	0	1	1	0	0	1	0	0	1	1	91	0	Small bowel cancer	drainage	fungal culture	0	16.3	3.1	1.11	NA	NA	NA	NA	34	4.37	13.2	147	0.21	2	1	2
61404770	1	71	cgu	0	1	1	0	0	1	0	1	1	1	1	1	0	1	1	1	0	1	1	12	12	Liver cancer	blood	blood culture	1	29.4	7.61	0.65	NA	NA	NA	NA	58	8.61	41.2	88.1	2.12	2	1	1
71402807	1	76	cpa	0	1	1	0	0	1	0	1	1	1	1	1	0	1	1	1	0	0	2	25	4	Stomach cancer	catheter	fungal culture	0	25	7.76	1.31	NA	NA	NA	NA	56	9.52	21.3	NA	NA	0	1	1
61702656	1	85	cgu	0	1	1	0	0	1	0	1	1	1	1	1	0	1	0	0	0	1	1	35	3	Colon cancer	blood	blood culture	0	35.3	2.83	0.28	NA	NA	NA	NA	81	3.28	13.1	60.5	0.46	1	1	2
71706202	1	43	cal	1	1	1	0	0	0	0	0	1	0	0	1	0	0	1	0	0	0	2	16	0	Colon cancer	drainage	fungal culture	0	29.1	12.86	0.31	NA	NA	NA	NA	26	13.3	6.2	93.9	0.25	0	1	1
61702330	2	29	cgu	0	1	1	0	0	1	0	1	1	1	0	1	0	0	0	0	0	1	2	19	0	Colon cancer	blood	blood culture	0	31	5.22	0.81	NA	NA	NA	NA	47	6.54	5.4	18	0.06	1	1	1
61400693	1	69	cpa	0	1	1	0	0	1	0	1	1	1	0	1	0	0	1	0	0	1	2	20	0	Stomach cancer	blood	blood culture	0	27.7	3.77	0.28	NA	NA	NA	NA	57	4.22	22	112	0.51	1	1	2
61308440	1	64	cgu	0	1	1	0	0	1	0	1	1	1	1	1	0	0	1	0	0	1	0	24	0	Stomach cancer	blood	blood culture	0	29.4	11.28	1.58	NA	NA	NA	NA	66	13.84	13.3	201	NA	1	1	1
61700289	1	59	cgu	0	1	1	0	0	1	0	0	0	0	0	0	0	0	1	0	0	1	1	26	0	Small bowel cancer	blood	blood culture	0	25.6	1.94	0.7	NA	NA	NA	NA	90	3.08	9.4	NA	NA	1	1	1
61405973	2	69	cpa	0	1	1	0	0	1	0	0	1	1	0	0	0	0	1	0	0	1	1	26	0	Colon cancer	blood	blood culture	0	28.8	4.94	0.78	NA	NA	NA	NA	64	5.92	10.1	85.1	0.5	1	1	2
61307019	1	76	cpa	0	1	1	0	0	1	0	1	1	1	1	1	0	1	1	1	0	1	2	17	5	Stomach cancer	blood	blood culture	0	26.1	3.88	0.35	NA	NA	NA	NA	66	4.36	11.4	36.6	0.26	1	1	2
61406515	2	65	cpa	0	1	1	0	0	1	0	1	1	1	1	1	0	1	1	1	0	1	1	23	6	Colon cancer	catheter,blood	fungal culture	0	27.6	4.28	1.92	NA	NA	NA	NA	68	7.09	13.1	10	0.42	1	1	2
61406557	1	88	cgu	0	1	1	0	0	1	0	1	1	1	0	1	0	1	0	1	0	0	1	27	10	Colon cancer	blood	blood culture	0	36.8	4.22	0.59	NA	NA	NA	NA	56	5.41	11.5	125	2.04	1	1	2
81700405	2	81	cal	1	2	1	0	0	1	0	1	1	1	1	1	0	1	1	1	1	1	2	36	10	Colon cancer	drainage	fungal culture	1	20.1	0	0	NA	NA	NA	NA	164	23.02	35.7	133	1.61	0	1	1
61307186	1	80	cgu	0	1	1	0	0	1	0	1	1	1	1	1	0	1	0	1	0	1	1	39	21	Prostate cancer	blood	blood culture	0	32.6	9.11	1.06	NA	NA	NA	NA	156	10.86	15.5	93.4	0.47	2	1	1
61601425	2	55	cal	1	1	1	0	0	0	0	0	1	0	0	0	1	0	1	0	1	1	1	17	0	Liver cancer	blood	blood culture	1	24.1	10.99	0.99	NA	NA	NA	NA	83	12.65	46.9	253	28.09	2	1	2
61707054	1	61	cgl	0	1	1	1	0	1	0	1	1	0	0	1	0	0	1	0	0	1	0	20	0	Rectal cancer	blood	blood culture	0	28.6	2.45	0.34	NA	NA	NA	NA	69	3.01	21.4	155.7	1.79	1	1	2
61610320	2	59	cgu	0	1	1	0	0	1	0	1	1	0	1	1	0	0	1	0	0	1	0	21	0	Small bowel cancer	blood	blood culture	0	27.3	2.85	0.31	NA	NA	NA	NA	56	3.58	7.4	16	0.14	1	1	1
61604679	1	50	cpa	0	1	1	0	0	1	0	1	1	0	0	1	0	0	1	0	0	1	1	23	0	Colon cancer	blood	blood culture	0	22.6	7.93	1.12	NA	NA	NA	NA	63	9.28	13.9	NA	NA	1	1	1
61704675	1	91	cgl	0	1	1	0	0	0	0	0	1	0	0	0	0	0	1	0	1	1	2	27	0	Rectal cancer	blood	blood culture	1	23.8	2.46	0.14	NA	NA	NA	NA	67	2.64	6	128	0.13	2	1	1
61402105	2	61	ctr	0	1	1	0	0	1	0	1	1	1	1	1	0	0	1	0	0	1	0	29	0	Small bowel cancer	blood,catheter	fungal culture	0	28.3	5.28	0.67	NA	NA	NA	NA	NA	6.23	12.2	NA	NA	1	1	1
61607764	1	56	cgu	0	1	1	0	0	1	0	1	0	0	0	1	0	0	1	1	0	0	1	30	0	Laryngopharyngeal carcinoma	blood	blood culture	0	24.6	6.26	0.47	NA	NA	NA	NA	63	6.81	13.5	110	6.15	1	1	1
61606294	1	62	cpa	0	1	1	1	0	1	0	1	1	1	1	1	0	0	1	0	0	1	1	33	0	Pancreatic cancer	blood	blood culture	0	27.1	7.21	0.42	NA	NA	NA	NA	52	8.33	237.4	NA	NA	2	1	1
61501784	2	63	cpa	0	1	1	0	0	1	0	1	1	0	0	1	0	0	1	0	0	1	0	47	0	Small bowel cancer	blood	blood culture	0	29	6.82	0.52	NA	NA	NA	NA	36	7.62	15.9	70.6	0.64	1	1	1
61407220	2	65	cpa	0	1	1	0	0	1	0	1	1	1	0	1	0	1	0	1	0	1	0	27	2	Colon cancer	blood	blood culture	0	30.9	3.77	0.42	NA	NA	NA	NA	60	4.45	2	97.9	4.86	1	1	2
61609840	1	53	cgu	0	1	1	0	0	1	0	1	1	1	1	1	0	1	1	0	0	1	2	28	1	Rectal cancer	blood	blood culture	0	20.4	11.83	0.4	NA	NA	NA	NA	43	12.55	7.5	413	29.62	2	1	2
61703097	2	81	cgu	0	2	1	0	0	1	0	1	1	1	1	1	0	1	0	1	1	1	1	35	10	Colon cancer	blood	blood culture	1	34.1	14.48	0.52	1.93	317	164	486	122	15.39	33.3	163	1.19	2	1	1
61600755	2	60	cal	1	1	1	1	0	0	0	0	1	1	1	0	1	1	1	0	0	1	1	62	7	Lung cancer	Pleural effusion	fungal culture	1	26.1	10.88	0.3	0.34	18	53	74	22	11.48	3.7	339	0.98	2	1	2
61505128	1	64	cpa	0	1	1	0	0	1	0	1	1	0	0	1	0	0	0	0	0	0	2	26	0	Rectal cancer	blood	blood culture	0	33.4	4.33	0.81	NA	NA	NA	NA	92	5.35	7.2	NA	NA	1	2	1
61710448	1	43	cpa	0	1	1	0	0	1	0	1	1	0	0	1	0	0	1	0	0	0	2	30	0	Pancreatic cancer	blood	blood culture	0	27.8	5.96	0.37	NA	NA	NA	NA	52	6.57	29.8	29.8	0.67	1	2	1
61408299	2	53	cpa	0	2	1	0	0	1	0	1	1	1	1	1	0	0	1	0	0	0	1	31	0	Sarcoma	catheter,blood	fungal culture	0	23.4	10.07	1.23	NA	NA	NA	NA	40	12.16	33.2	120	0.84	2	2	2
61403733	1	52	cpa	0	1	1	0	0	1	0	0	1	1	1	1	0	0	0	0	0	0	2	32	0	Stomach cancer	blood	blood culture	0	30.5	1.62	0.32	NA	NA	NA	NA	85	2.19	5.3	39.8	0.27	1	2	1
71606214	1	74	ctr	0	1	1	0	0	1	0	1	1	1	1	1	0	0	1	0	0	1	2	35	0	Liver cancer	catheter	fungal culture	0	27.4	5.8	0.91	NA	NA	NA	NA	NA	8.01	10.3	NA	NA	0	2	2
61408332	2	58	cpa	0	1	1	0	0	1	0	1	1	1	1	1	0	0	1	0	0	0	1	36	0	Cholangiocarcinoma	blood	blood culture	0	25.5	8.57	0.64	NA	NA	NA	NA	55	10.23	17.7	NA	NA	1	2	1
61400811	1	56	cgu	0	1	1	0	0	1	0	1	1	0	1	1	0	0	1	0	0	0	0	46	0	Ampullary carcinoma	blood	blood culture	0	25.6	8.07	0.43	NA	NA	NA	NA	59	9.09	6.1	NA	NA	1	2	1
61609352	2	56	cgu	0	1	1	0	0	1	0	1	1	0	1	1	0	0	1	0	0	1	0	60	0	Pancreatic cancer	blood	blood culture	0	25.8	7.83	0.46	NA	NA	NA	NA	48	8.79	17	82.7	4.16	2	2	1
61408644	1	27	cpa	0	2	1	0	0	1	0	0	0	0	1	1	0	0	1	0	0	1	1	90	0	Small bowel cancer	blood	blood culture	0	16.7	5.72	1.12	NA	NA	NA	NA	28	7.32	11.4	76	0.21	2	2	2
71701963	1	58	cpa	0	1	1	0	0	0	0	1	1	1	1	0	0	1	1	1	0	1	0	15	15	Esophageal cancer	catheter	fungal culture	1	26.7	10.05	0.88	8.14	268	33	305	55	11.58	8.1	143	0.28	2	2	2
71604634	2	63	cgl	0	1	1	0	0	1	0	1	1	1	1	1	1	1	1	1	1	0	2	17	2	Rectal cancer	catheter	fungal culture	0	23.5	7.04	0.12	3.42	51	15	68	29	7.34	11.1	NA	NA	0	2	1
71604298	1	62	cgu	0	2	1	0	0	1	0	1	1	1	1	1	0	1	1	0	0	0	0	32	1	Stomach cancer	catheter	fungal culture	1	28.7	13.32	0.25	NA	NA	NA	NA	66	13.85	63.6	54.4	0.6	1	2	2
61700265	2	68	cgu	0	1	1	0	0	1	0	1	1	1	1	1	0	1	0	1	0	1	0	38	8	Stomach cancer	blood	blood culture	0	32.3	5.11	0.75	NA	NA	NA	NA	37	7.13	21.8	129	0.2	2	2	2
61406355	1	61	cpa	0	1	1	1	0	1	0	1	1	1	1	1	1	1	1	0	0	1	1	45	7	Colon cancer	blood	blood culture	0	26.6	6.3	0.8	1.45	150	229	386	43	7.31	21.6	2.33	NA	2	2	2
71606055	2	62	cpa	0	1	1	0	0	1	0	1	1	0	1	1	0	1	1	1	1	1	1	48	3	Cervical cancer	catheter	fungal culture	0	27.1	8.84	0.31	NA	NA	NA	NA	53	9.49	18.1	174	1.02	1	2	2
61407207	2	77	cpa	0	1	1	0	0	1	0	1	1	1	1	1	0	1	0	1	0	1	1	51	16	Stomach cancer	blood	blood culture	0	31.6	6.09	0.76	NA	NA	NA	NA	130	7.76	18.7	122	5.37	2	2	2
61306517	1	64	cal	1	1	1	1	0	1	0	0	1	1	1	0	0	1	1	1	0	0	0	72	17	Stomach cancer	blood	blood culture	0	29.3	4.62	0.41	NA	NA	NA	NA	103	5.31	14.9	291	2.72	2	2	2
71604397	2	60	cgu	0	1	1	0	0	1	0	0	1	1	1	0	0	0	1	0	0	0	2	17	0	Small bowel cancer	catheter	fungal culture	0	27.8	5.68	0.54	NA	NA	NA	NA	44	6.6	10.4	NA	NA	0	2	1
81601222	1	75	cgl	0	1	1	0	0	1	0	1	1	1	0	1	0	0	1	0	0	1	2	23	0	Stomach cancer	drainage	fungal culture	0	21.4	12.57	1.05	NA	NA	NA	NA	63	14.77	21.6	99.9	0.38	0	2	2
61607969	1	65	cgu	0	1	1	0	0	1	0	0	1	1	0	1	0	0	1	0	0	0	2	30	0	Stomach cancer	blood	blood culture	0	28	14.56	0.98	NA	NA	NA	NA	48	16.54	48	141	2.23	1	2	1
71307181	1	80	cpa	0	1	1	0	0	1	0	1	1	0	1	1	0	0	1	0	0	0	2	40	0	Colon cancer	catheter	fungal culture	0	23.1	7.75	0.8	NA	NA	NA	NA	78	9.32	16	NA	NA	0	2	2
61604757	1	62	cpa	0	2	1	0	0	1	0	1	1	1	1	1	0	1	1	1	0	0	0	32	1	Stomach cancer	blood	blood culture	1	28.7	13.32	0.25	NA	NA	NA	NA	66	13.85	92.1	54.4	0.6	1	2	16
71406726	2	75	cpa	0	1	1	0	0	1	0	1	1	1	0	1	1	1	0	1	0	1	2	33	4	Cervical cancer	catheter	fungal culture	0	34.9	5.8	0.17	NA	NA	NA	NA	38	6.18	15.3	NA	NA	2	2	1
61702281	2	64	cgu	0	1	1	0	0	1	0	1	1	1	1	1	1	1	0	1	0	1	0	38	3	Colon cancer	blood	blood culture	0	30.2	1.98	0.56	NA	NA	NA	NA	38	2.86	9.5	70.9	0.22	2	2	2
61507650	1	61	cpa	0	1	1	0	0	1	0	1	1	0	0	1	0	0	0	0	0	0	2	20	0	Cholangiocarcinoma	blood	blood culture	0	33	7.06	0.75	NA	NA	NA	NA	52	8.31	103.9	76.8	0.62	2	2	1
61610230	1	60	cgu	0	1	1	0	0	1	0	1	1	0	1	1	0	0	1	0	0	1	0	26	0	Stomach cancer	blood	blood culture	0	28.1	3.01	1.73	NA	NA	NA	NA	130	5.5	118.5	NA	NA	1	2	1
61604675	1	62	cpa	0	1	1	0	0	1	0	1	1	1	1	1	1	0	1	0	0	1	2	29	0	Stomach cancer	blood	blood culture	0	22.3	3.51	1.31	0.64	848	1328	2429	75	5.54	19.8	120	0.32	1	2	2
71606845	2	66	cgu	0	1	1	0	0	1	0	1	1	1	1	1	0	0	0	0	0	0	0	35	0	Pancreatic cancer	catheter	fungal culture	0	31.4	13.57	1.08	NA	NA	NA	NA	39	15.42	128.7	78.1	0.7	0	2	1
71708550	1	45	cpa	0	1	1	0	0	1	0	0	0	0	0	0	0	0	1	0	0	1	2	50	0	Liver cancer	catheter	fungal culture	1	28.9	7.53	0.69	NA	NA	NA	NA	69	10.07	23.2	NA	NA	0	2	1
61401321	2	58	cpa	0	1	1	0	0	1	0	1	1	0	0	1	0	0	1	0	0	1	1	62	0	Pancreatic cancer	blood,catheter	blood culture	0	25.2	3.42	0.59	NA	NA	NA	NA	29	4.37	122.9	NA	NA	1	2	2
61606709	2	64	cgu	0	2	1	0	0	1	0	0	1	1	1	1	0	1	1	1	1	0	0	24	11	Ovarian cancer	blood	blood culture	0	29.7	3.4	0.81	2.28	169	74	241	85	4.29	13.8	73.5	4.12	2	2	1
81700705	1	60	ckr	0	1	1	0	0	1	0	1	1	1	1	1	0	1	1	1	1	0	2	24	6	Rectal cancer	drainage	fungal culture	1	16.5	15.25	0.63	1.88	174	93	266	454	16.18	42.6	250	14.61	2	2	2
61407199	1	68	cpa	0	1	1	0	0	1	0	1	1	1	1	1	0	1	0	1	0	0	0	25	11	Colon cancer	blood	blood culture	0	31.9	2.94	0.7	NA	NA	NA	NA	76	4.09	21.1	114	3.28	2	2	2
61405164	1	54	cpa	0	1	1	0	0	1	0	1	1	1	1	1	0	1	1	1	0	0	1	72	21	Small bowel cancer	blood	blood culture	0	23.4	12.56	1.18	NA	NA	NA	NA	45	15.54	9.6	119	0.21	2	2	1
71606057	2	45	cgu	0	1	1	0	0	1	0	1	1	1	1	1	0	0	1	0	0	1	2	19	0	Colon cancer	catheter	fungal culture	0	24.6	2.56	0.2	NA	NA	NA	NA	45	2.96	4.5	NA	NA	0	2	1
61609602	2	54	cgu	0	1	1	0	0	1	0	1	1	1	0	0	0	0	0	0	0	1	2	26	0	Rectal cancer	blood	blood culture	0	31.6	7.07	0.51	NA	NA	NA	NA	57	8.03	3	NA	NA	1	2	1
61605020	2	50	cgu	0	1	1	0	0	1	0	1	1	0	0	1	0	0	0	0	0	0	2	30	0	Pancreatic cancer	blood	blood culture	0	31.9	4.29	0.64	NA	NA	NA	NA	27	5.31	29.7	24.7	0.33	1	2	2
61702340	2	53	cgu	0	1	1	0	0	1	0	1	1	0	0	1	0	0	1	0	0	1	0	35	0	Pancreatic cancer	blood	blood culture	0	24.9	10.58	0.61	NA	NA	NA	NA	40	11.55	5.1	NA	NA	1	2	1
61304893	2	58	cpa	0	1	1	1	0	1	0	1	1	0	1	1	0	0	1	0	0	0	1	39	0	Pancreatic cancer	blood	blood culture	0	25	8.79	0.61	NA	NA	NA	NA	51	10.11	120.1	NA	0.41	1	2	1
61606065	1	43	cgu	0	1	1	0	0	1	0	1	1	0	1	1	0	0	1	0	0	1	1	47	0	Small bowel cancer	blood	blood culture	0	21.9	5.96	0.41	NA	NA	NA	NA	52	6.7	8.8	71.5	1.07	1	2	2
61607857	1	73	cpa	0	1	1	0	0	1	0	0	1	1	1	1	0	1	0	1	0	1	1	130	3	Stomach cancer	blood	blood culture	0	30.4	4.81	0.53	NA	NA	NA	NA	32	5.88	39.9	101	0.31	2	2	1
71600312	1	68	cal	1	1	1	0	0	1	0	1	1	1	1	1	0	1	1	1	1	0	1	33	6	Cholangiocarcinoma	drainage	fungal culture	0	28.5	12.51	0.77	NA	NA	NA	NA	82	14.19	221.9	183	3.72	2	2	1
61403800	2	71	cgu	0	1	1	0	0	1	0	1	1	1	1	1	0	1	0	1	0	1	0	49	11	Stomach cancer	blood	blood culture	0	33	4.15	0.56	NA	NA	NA	NA	41	5.06	10.7	110	0.37	2	2	2
71708596	1	85	cal	1	1	1	1	0	1	0	1	1	1	1	0	0	1	0	1	0	0	1	65	26	Stomach cancer	drainage	fungal culture	0	35.3	14.18	0.97	NA	NA	NA	NA	88	17.63	79.3	266	4.92	1	2	2
71702942	1	62	ctr	0	1	1	0	0	1	0	1	1	1	1	0	0	0	1	0	0	0	2	28	0	Cholangiocarcinoma	drainage	fungal culture	0	28.8	5.29	1.39	NA	NA	NA	NA	50	8.01	27	NA	NA	0	2	1
71404999	1	37	cgu	0	1	1	0	0	1	0	1	1	1	1	1	0	0	0	0	0	0	2	31	0	Pancreatic cancer	catheter	fungal culture	0	34.1	10.46	0.9	NA	NA	NA	NA	48	12.33	121	NA	NA	1	2	1
61307016	2	62	cal	1	1	1	0	0	0	0	0	1	0	0	0	0	0	0	0	0	1	2	38	0	Esophageal cancer	blood	blood culture	1	32.7	9.62	1.92	0.93	1113	1200	2400	71	12.62	20.7	77	0.14	1	2	1
61306333	2	71	cpa	0	1	1	0	0	1	0	1	0	0	0	0	0	0	0	0	0	0	2	59	0	Colon cancer	blood	blood culture	0	31	6.8	0.56	NA	NA	NA	NA	58	7.74	8.2	NA	NA	1	2	1
61606380	2	57	cpa	0	1	1	0	0	1	0	0	0	0	1	0	0	0	1	0	0	1	0	24	0	Rectal cancer	blood	blood culture	0	26	2.5	0.83	NA	NA	NA	NA	48	3.58	7.4	18.7	0.26	1	2	2
61401681	1	67	cpa	0	1	1	0	0	1	0	1	1	0	1	1	0	0	1	0	0	0	2	31	0	Small bowel cancer	blood	blood culture	0	28.3	5.81	2.3	NA	NA	NA	NA	47	9.13	156.2	NA	NA	1	2	1
61700145	1	59	cgu	0	1	1	1	0	1	0	1	1	1	1	1	0	0	1	0	0	1	0	49	0	Colon cancer	blood	blood culture	0	27.7	6.02	0.66	NA	NA	NA	NA	68	7.31	25.7	78.8	0.34	1	2	2
61604960	1	64	cpa	0	1	1	0	0	1	0	0	0	0	1	1	0	0	1	0	0	1	1	65	0	Bladder Cancer	blood	blood culture	0	27.4	10.23	0.6	NA	NA	NA	NA	45	10.95	14.1	69.4	0.71	1	2	2
71501079	1	51	cal	1	1	1	0	0	1	0	0	1	1	1	1	0	0	1	0	0	1	0	88	0	Cholangiocarcinoma	drainage	fungal culture	0	24	10.24	3.35	NA	NA	NA	NA	67	14.5	84.8	80.8	1.99	1	2	2
81702098	1	63	cal	1	1	1	0	0	1	0	1	1	1	1	1	0	1	1	1	0	0	2	24	6	Colon cancer	drainage	fungal culture	0	18	5.21	0.53	2	305	152	472	296	6.17	56.1	196.1	51.99	2	2	2
61407205	1	56	cpa	0	1	1	0	0	1	1	1	1	1	1	1	0	1	1	1	1	1	1	67	54	Rectal cancer	blood	blood culture	1	24.5	9.62	0.96	NA	NA	NA	NA	87	11.13	18.8	192	>100.00	2	2	2
61406330	1	56	cpa	0	1	1	0	0	1	0	1	1	0	0	1	0	0	1	0	0	0	1	31	0	Pancreatic cancer	blood	blood culture	0	24.3	12.2	0.89	NA	NA	NA	NA	56	14.33	188.9	NA	NA	2	2	2
71702279	1	58	cal	1	1	1	0	1	1	0	1	1	1	1	1	0	0	1	0	0	1	0	34	0	Pancreatic cancer	puncture	fungal culture	0	26.8	18.7	1.92	NA	NA	NA	NA	NA	22.59	69.8	NA	NA	0	2	1
71507985	2	55	cal	1	1	1	0	0	1	0	1	1	0	1	1	0	0	1	0	0	1	2	44	0	Small bowel cancer	puncture	fungal culture	0	22.5	9.89	1.59	NA	NA	NA	NA	30	12.26	130.9	NA	NA	0	2	1
61702499	1	67	cpa	0	1	1	1	0	1	1	1	1	0	1	1	0	0	1	0	0	0	1	56	0	Stomach cancer	blood	blood culture	0	28.3	8.95	0.3	NA	NA	NA	NA	91	9.41	34.4	43.2	0.73	2	2	1
61403389	1	77	cpa	0	1	1	0	0	1	1	1	1	1	1	1	0	1	0	1	0	1	1	34	20	Cholangiocarcinoma	blood	blood culture	0	31.5	4.22	0.61	NA	NA	NA	NA	35	5.1	165	103	0.26	2	2	2
61400211	1	74	cgu	0	1	1	0	0	1	0	1	1	1	1	1	0	1	0	1	0	1	0	36	6	Rectal cancer	blood	blood culture	0	34	9.99	0.44	NA	NA	NA	NA	110	10.68	7	60.2	0.1	2	2	2
61306449	1	74	cal	1	2	1	0	0	1	0	1	1	0	0	0	0	1	1	0	1	1	2	39	9	Rectal cancer	blood	blood culture	0	26.2	3.87	0.6	NA	NA	NA	NA	31	5	5.7	57.8	0.29	1	2	2
61308339	2	51	cgu	0	1	1	1	0	1	0	1	1	0	0	1	0	0	1	0	0	1	0	32	0	Stomach cancer	blood	blood culture	0	23.7	6.35	1.19	NA	NA	NA	NA	57	8.8	4.6	NA	NA	1	2	1
61605183	1	64	cpa	0	1	1	1	0	1	1	0	1	1	1	1	0	1	1	1	1	1	1	30	19	Liver cancer	blood	blood culture	1	27.5	2.4	0.68	NA	NA	NA	NA	161	3.15	327.7	63.4	1.45	2	2	1
61700697	1	54	cgu	0	1	1	0	0	1	0	1	1	1	1	1	0	1	1	1	1	1	1	40	20	Stomach cancer	blood	blood culture	0	23.6	3.36	0.83	NA	NA	NA	NA	510	4.56	21.3	107	18.17	2	2	2
61605973	1	43	cgu	0	1	1	0	0	1	0	1	1	1	1	1	0	0	1	0	0	0	1	39	0	Cholangiocarcinoma	blood	blood culture	0	21.6	8.51	0.93	NA	NA	NA	NA	62	11.52	191.4	201	0.92	1	2	1
81501594	2	75	cgl	0	2	1	0	0	1	1	0	1	1	1	1	0	1	0	1	1	1	1	47	21	Colon cancer	puncture	fungal culture	1	31.2	6.55	0.55	4.18	226	54	286	53	7.42	54.2	102	0.36	0	2	1
61600971	1	84	cpa	0	1	1	0	0	1	0	1	1	1	1	1	0	1	1	1	0	1	2	70	22	Rectal cancer	catheter	fungal culture	0	24.8	5.34	1.43	3.08	746	242	994	86	7.98	21.5	48.6	0.18	1	2	2
71700347	1	46	cal	1	1	1	0	0	1	0	1	1	0	1	1	0	0	1	0	0	1	0	45	0	Stomach cancer	drainage	fungal culture	0	22.6	4.49	1.06	NA	NA	NA	NA	54	6.08	10.6	28.1	0.16	0	2	1
61502177	1	69	cpa	0	1	1	0	0	1	0	1	1	1	0	1	0	1	0	1	0	1	0	25	4	Rectal cancer	blood	blood culture	0	32.4	4.08	0.46	NA	NA	NA	NA	53	4.96	12.9	98	2.11	1	2	2
81501594	2	75	ctr	0	2	1	0	0	1	1	1	1	1	1	1	0	1	0	1	1	0	0	48	22	Colon cancer	puncture	fungal culture	1	34.2	6.55	0.55	4.18	226	54	286	53	7.42	54.2	102	0.36	2	2	2
71405156	1	71	cal	1	1	1	0	0	0	0	1	0	0	0	1	0	0	1	0	0	0	2	31	0	Cholangiocarcinoma	puncture	fungal culture	0	29	5.09	1.28	NA	NA	NA	NA	62	7.17	87.3	32	0.1	0	2	2
71606943	1	65	cgl	0	2	1	0	0	1	0	1	1	1	0	1	0	0	1	0	0	1	1	62	0	Colon cancer	catheter	fungal culture	0	27.8	2.77	1.86	NA	NA	NA	NA	43	5.25	11.4	NA	NA	2	2	1
61700900	1	53	cgu	0	1	1	0	0	1	0	1	1	0	1	1	0	0	1	0	0	1	0	45	0	Stomach cancer	blood	blood culture	0	24.8	7.37	1.25	NA	NA	NA	NA	63	10.08	20.6	175	0.39	2	2	2
61502307	1	68	cpa	0	1	1	0	0	1	0	0	1	1	1	1	0	0	1	0	0	0	1	48	0	Stomach cancer	blood	blood culture	0	28.4	7.71	0.94	NA	NA	NA	NA	51	8.96	29.4	115	0.84	1	2	2
71408934	2	60	cal	1	2	1	1	0	1	0	1	1	0	0	1	0	1	1	0	0	1	1	54	22	Pancreatic cancer	drainage	fungal culture	0	26.1	0	0	1.37	399	292	723	112	33.6	63.8	123	0.57	2	2	2
61404035	1	46	cal	1	1	1	0	0	1	0	0	1	0	1	0	0	1	1	1	1	1	1	58	34	Ampullary carcinoma	blood	blood culture	1	22.1	15.28	0.57	NA	NA	NA	NA	59	16.82	17.3	110	3.37	2	2	2
71402485	2	67	cpa	0	1	1	1	0	1	0	0	1	0	1	1	0	0	1	0	0	0	2	54	0	Pancreatic cancer	catheter	fungal culture	0	29.9	3.02	1.96	NA	NA	NA	NA	55	5.33	28.4	NA	NA	0	2	1
61607624	1	65	cpa	0	2	1	0	0	1	0	0	1	1	0	1	0	0	1	0	0	1	1	62	0	Colon cancer	blood	blood culture	0	27.6	4.4	1.09	NA	NA	NA	NA	69	5.87	9.7	174	1.03	2	2	1
61306230	1	39	cal	1	1	1	0	0	0	0	0	1	0	0	0	1	1	1	0	0	1	1	155	1	Neuroendocrine carcinoma	blood	blood culture	1	20.5	6.75	1.11	NA	NA	NA	NA	42	8.51	7.1	NA	13.58	2	2	2
61700259	1	54	cgu	0	1	1	0	0	1	0	1	1	1	1	1	0	1	1	1	0	0	0	64	7	Colon cancer	blood	blood culture	0	25.1	3.47	0.4	NA	NA	NA	NA	52	4.3	14.7	130	0.53	2	2	2
61602044	1	66	cpa	0	1	1	0	0	1	0	0	1	1	1	1	0	0	1	0	0	0	1	50	0	Cholangiocarcinoma	catheter	fungal culture	0	28.1	4.92	1.04	NA	NA	NA	NA	79	6.5	14.2	78.5	0.59	2	2	2
61401596	2	42	cpa	0	1	1	0	0	1	0	1	1	0	1	1	0	0	1	0	0	0	1	53	0	Pancreatic cancer	catheter,blood	fungal culture	0	21.2	6.91	0.59	NA	NA	NA	NA	45	7.86	8.9	132	0.24	1	2	1
61400455	1	85	cpa	0	2	1	1	0	1	0	1	1	1	1	1	0	1	0	1	0	1	0	55	32	Rectal cancer	blood	blood culture	0	39.2	3.99	1.2	NA	NA	NA	NA	134	5.41	16	103	0.39	2	2	2
61307317	2	72	cpa	0	1	1	0	0	1	0	1	1	0	0	1	0	0	0	0	0	1	0	39	0	Pancreatic cancer	blood	blood culture	0	33	8.34	0.51	NA	NA	NA	NA	37	9.37	53	NA	NA	2	2	2
61607320	2	43	cpa	0	1	1	0	0	1	0	1	1	1	1	1	0	0	1	0	0	1	2	53	0	Gallbladder cancer	blood	blood culture	0	28.1	9.17	0.84	NA	NA	NA	NA	51	10.63	103.4	NA	NA	2	2	1
71403359	1	62	cal	1	1	1	0	0	1	0	1	1	0	0	1	0	1	0	0	0	0	2	51	10	Bladder Cancer	puncture	fungal culture	0	31.2	4.65	0.89	NA	NA	NA	NA	53	6.48	10.7	6.28	NA	1	2	2
61407732	1	55	cpa	0	1	1	0	0	1	0	1	1	1	1	1	0	1	1	1	0	1	1	56	11	Ampullary carcinoma	blood	blood culture	0	23.9	13.77	0.89	NA	NA	NA	NA	55	15.27	13.6	148	13.49	2	2	2
61405960	2	56	cal	1	1	1	0	0	1	0	0	0	0	1	1	1	0	1	0	0	1	0	44	0	Gallbladder cancer	blood	blood culture	1	25.7	5.42	1.63	NA	NA	NA	NA	88	7.46	7.2	76.1	1.52	2	2	1
61308188	1	70	cgu	0	2	1	0	0	1	0	1	1	1	1	1	0	1	0	1	1	1	0	39	32	Stomach cancer	blood	blood culture	0	32.8	13.62	0.75	NA	NA	NA	NA	51	14.57	119	106	0.25	2	2	2
81500332	1	59	cal	1	1	1	0	0	1	0	1	1	1	0	1	1	0	1	1	0	1	1	87	0	Lung cancer	Pleural effusion	fungal culture	0	25.6	11.05	1.76	NA	NA	NA	NA	38	13.61	6	69.6	0.04	2	2	2
61402209	1	61	cgu	0	1	1	0	0	1	0	1	1	1	1	1	0	1	1	1	0	0	1	36	5	Pancreatic cancer	blood	blood culture	0	26.5	8.45	1.04	NA	NA	NA	NA	64	10.27	23.6	104	1.09	2	2	2
61307439	1	67	cpa	0	1	1	0	0	1	0	1	1	1	1	1	0	1	0	0	0	1	2	37	2	Stomach cancer	blood,catheter	fungal culture	0	34.3	3.69	0.54	NA	NA	NA	NA	72	4.65	14.9	64.5	1.48	1	2	2
61610040	1	74	cgu	0	2	1	1	0	1	0	1	1	1	1	1	0	1	0	1	0	1	1	56	35	Colon cancer	blood	blood culture	0	30.7	4.4	1.13	NA	NA	NA	NA	41	5.91	14.5	98.3	0.74	2	2	2
61400018	1	70	cgu	0	1	1	0	0	1	0	1	1	1	1	1	0	1	1	1	1	0	1	62	21	Bladder Cancer	blood	blood culture	1	29	13.48	0.77	4.31	159	103	238	116	14.9	169	93	0.88	2	2	2
61608012	1	65	cpa	0	1	1	0	0	1	0	1	1	0	1	1	0	0	1	0	0	1	1	49	0	Pancreatic cancer	blood	blood culture	0	27.7	3.92	0.86	NA	NA	NA	NA	43	5.31	25.1	NA	NA	2	2	2
61308338	1	70	cpa	0	2	1	0	0	1	0	0	1	1	1	1	0	1	1	1	1	1	1	39	34	Stomach cancer	blood	blood culture	0	28.9	10.89	0.44	2.6	37	14	50	50	11.57	66.4	39.5	0.46	2	2	2
61405189	1	60	cpa	0	2	1	0	0	1	1	0	1	1	1	1	0	1	1	1	0	0	1	46	10	Ampullary carcinoma	blood	blood culture	1	26	9.37	0.88	NA	NA	NA	NA	120	10.87	78.1	86.3	1.19	2	2	2
61304738	1	63	cpa	0	1	1	0	0	1	0	0	1	0	1	1	0	0	1	0	0	0	1	58	0	Rectal cancer	blood	blood culture	0	27.3	3.09	0.7	NA	NA	NA	NA	74	4.17	32.3	NA	NA	1	2	2
61507782	1	60	cgl	0	1	1	0	0	1	0	1	1	1	1	1	0	1	1	1	0	1	0	60	13	Colon cancer	blood	blood culture	0	27.8	9.56	0.75	1.29	377	292	682	68	10.56	34.5	87.4	14.29	1	2	2
61703495	1	53	cgu	0	1	1	1	0	1	0	0	1	1	0	1	0	0	1	0	0	1	0	68	0	Cholangiocarcinoma	blood	blood culture	0	24.9	4.63	0.73	NA	NA	NA	NA	NA	6.07	29.1	NA	0.32	2	2	1
61501774	2	61	cpa	0	2	1	1	0	1	0	0	0	0	0	1	0	0	1	0	0	1	1	46	0	Pancreatic cancer	blood,catheter	blood culture	0	26.6	4	0.85	NA	NA	NA	NA	34	5.35	10.2	83.1	0.23	2	2	1
61700091	1	69	cpa	0	1	1	0	0	1	0	1	1	0	0	1	0	0	0	0	0	0	2	46	0	Small bowel cancer	blood	blood culture	0	33.8	11.53	0.59	NA	NA	NA	NA	50	12.87	25.6	63.5	0.31	1	2	1
61405974	2	71	cpa	0	2	1	0	0	1	0	0	1	0	1	1	0	0	1	0	0	1	1	60	0	Cholangiocarcinoma	blood	blood culture	0	29.6	8.59	1.36	NA	NA	NA	NA	27	10.37	26.6	28.3	NA	2	2	2
61709965	2	62	cal	1	1	1	0	0	1	0	0	1	0	1	1	0	0	1	0	0	0	0	75	0	Pancreatic cancer	blood	blood culture	0	28.8	9.21	0.51	NA	NA	NA	NA	34	10.25	21.3	NA	NA	2	2	1
61402035	2	55	cpa	0	1	1	0	0	1	0	1	1	1	1	1	0	1	1	1	0	1	1	136	57	Cervical cancer	catheter,blood	fungal culture	0	23.9	3.86	1.1	NA	NA	NA	NA	86	5.01	13.8	53.2	0.51	2	2	2
71604855	1	56	ckr	0	2	1	0	0	1	0	0	1	1	1	0	1	1	1	1	0	1	1	114	105	Lung cancer	catheter	fungal culture	1	24.5	15	1.27	2.62	397	152	567	56	18.18	16.5	12.2	0.11	2	2	2
61700347	1	69	ctr	0	1	1	0	0	0	0	1	0	1	1	1	0	1	0	0	0	1	2	61	14	Bladder Cancer	blood	blood culture	1	37	4.62	0.3	NA	NA	NA	NA	186	5.19	145.5	337	1.86	2	2	2
81500926	1	53	ckr	0	2	1	0	0	1	0	0	1	0	0	1	0	0	1	1	1	0	1	82	0	Esophageal cancer	drainage	fungal culture	0	23.4	6.34	3.96	0.6	234	390	654	35	11.12	4.5	81.1	0.07	2	2	2
61607476	2	53	cpa	0	2	1	0	0	1	0	0	1	1	1	1	0	1	1	1	0	1	0	120	15	Small bowel cancer	blood	blood culture	0	24.4	6.4	3.11	1.1	317	289	613	50	10.25	15.3	30.9	0.08	2	2	2
61706960	1	74	cgl	0	1	1	0	0	1	0	1	1	1	1	1	0	1	0	1	0	1	1	98	25	Stomach cancer	blood	blood culture	0	30.9	4.84	1.16	1.97	304	154	467	102	6.64	30.9	146.2	1.04	2	2	2
71504858	2	68	cal	1	1	1	0	0	1	0	0	1	1	1	1	0	1	1	1	0	1	1	135	7	Colon cancer	catheter	fungal culture	0	28.4	8.67	0.72	NA	NA	NA	NA	23	9.66	12.7	78.9	0.16	2	2	2
61400012	1	93	cgu	0	2	1	1	0	1	0	0	1	1	1	1	0	1	0	1	0	1	1	135	120	Lung cancer	blood	blood culture	1	38.3	10.44	0.89	NA	NA	NA	NA	62	11.49	22.9	68.9	0.15	2	2	2
71505288	1	45	cal	1	1	1	0	0	1	0	1	1	1	0	0	0	0	1	1	0	1	1	367	0	Esophageal cancer	Pleural effusion	fungal culture	0	22	8.32	1.13	NA	NA	NA	NA	38	10.15	8.7	95.4	0.2	2	2	2
71501003	1	70	cpa	0	1	1	0	0	1	0	0	1	1	0	1	0	0	1	1	1	0	1	337	0	Esophageal cancer	Pleural effusion	fungal culture	0	29.2	8.92	0.69	NA	NA	NA	NA	40	10.32	13.6	70.6	0.08	2	2	2

## Sheet: Supplementary Table 2
	Antifungal agent	MIC (μg/ mL)	Susceptible	Non-susceptible	Resistant
Candida albicans	Fluconazole (n=33)	<1	32	0	1
	Voriconazole (n=33)	<0.06	33	0	0
	Itraconazole (n=33)	<0.125	32	0	1
	Amphotericin B (n=33)	<0.5	33	0	0
	Flucytosine (n=33)	<4	32	0	1
Candida parapsilosis	Fluconazole (n=101)	<1	101	0	0
	Voriconazole (n=101)	<0.06	101	0	0
	Itraconazole (n=101)	<0.125	101	0	0
	Amphotericin B (n=101)	<0.5	101	0	0
	Flucytosine(n=101)	<4	101	0	0
Candida guilliermondii	Fluconazole (n=83)	<1	81	1	1
	Voriconazole (n=83)	<0.06	83	0	0
	Itraconazole (n=83)	<0.125	80	3	0
	Amphotericin B (n=83)	<0.5	83	0	0
	Flucytosine (n=83)	<4	83	0	0
Candida glabrata	fluconazole (n=17)	<1	5	12	0
	voriconazole (n=17)	<0.06	17	0	0
	itraconazole(n=17)	<0.125	13	4	0
	Amphotericin B(n=17)	<0.5	17	0	0
	Fluorine cytosine (n=17)	<4	17	0	0
Supplementary Table 2: The susceptible test results of 243 isolates to five anticandida drugs.
Candida tropicalis	Fluconazole (n=7)	<1	6	1	0
	Voriconazole (n=7)	<0.06	5	2	0
	Itraconazole (n=7)	<0.125	7	0	0
	Amphotericin B (n=7)	<0.5	7	0	0
	Flucytosine(n=7)	<4	7	0	0
Candida krusei	Fluconazole (n=3)	<1	1	1	1
	Voriconazole (n=3)	<0.125	3	0	0
	Itraconazole (n=3)	<0.125	1	2	0
	Amphotericin B (n=3)	<0.5	3	0	0
	Flucytosine (n=3)	<4	1	2	0
All fungi	Fluconazole (n=243)	<1	226	15	3
	Voriconazole (n=243)	<0.125	241	2	0
	Itraconazole (n=243)	<0.125	234	8	1
	Amphotericin B (n=243)	<0.5	243	0	0
	Flucytosine(n=243)	<4	240	2	1
